# Supplementary material for: A rice husk-derived SiOx/C composite for effective lithium-sulfur battery separator modification
Source: Royal Society of Chemistry journal article supplement (doi:10.1039/d4nr05435k), 2025-01-01
Supplement: d4nr05435k1.pdf [file d4nr05435k1.pdf]

## Supporting information

### Rice husk-derived SiO<sub>x</sub>/C composite for effective lithium-sulfur battery separator modification

*Youngseul Cho<sup>a,1</sup>, Se Hun Lee<sup>b,1</sup>, Yongyeol Park<sup>b,c</sup>, Tianyu Chen<sup>a</sup>, Kyu Sang Lee<sup>c</sup>, Ok Sung Jeon<sup>b</sup>, Dongpyo Hong<sup>b</sup>, Young Pyo Jeon<sup>b</sup>, Young Joon Yoo<sup>b,\*</sup>, Sang Yoon Park<sup>d,\*</sup>, Yuanzhe Piao<sup>c,\*</sup>*

#### Corresponding authors:

*Young Joon Yoo<sup>b</sup>, Sang Yoon Park<sup>d</sup>, and Yuanzhe Piao<sup>c</sup>*

<sup>a</sup>Program in Nano Science and Technology, Graduate School of Convergence Science and Technology, Seoul National University, 145 Gwanggyo-ro, Yeongtong-gu, Suwon-Si, Gyeonggi-do 16229, Republic of Korea

<sup>b</sup>Center for Applied Electromagnetic Research for Advanced Institute of Convergence Technology, Seoul National University, Gyeonggi-do 16229, Republic of Korea

<sup>c</sup>Department of Applied Bioengineering, Graduate School of Convergence Science and Technology, Seoul National University, 145 Gwanggyo-ro, Yeongtong-gu, Suwon-Si, Gyeonggi-do 16229, Republic of Korea

<sup>d</sup>School of Electronic Engineering, Kyonggi University, Suwon-si, Republic of Korea

---

\*Corresponding author e-mail addresses: [youngjoonyoo@snu.ac.kr](mailto:youngjoonyoo@snu.ac.kr), [yoonpark@kgu.ac.kr](mailto:yoonpark@kgu.ac.kr), [parkat9@snu.ac.kr](mailto:parkat9@snu.ac.kr)

- Fig. S1.** SEM images of bare rice husk at (a-b) low magnification and (c-d) high magnification.
- Fig. S2.** Synthesis flow chart in the salt-assisted method.
- Fig. S3.** SEM images of S-MRH with (a-c) low and (d-f) high magnifications.
- Fig. S4.** Unclipped cross-sectional SEM image of S-MRH/PP.
- Fig. S5.** XPS survey spectra of S-MRH and B-MRH before the lithium polysulfide adsorption test.
- Fig. S6.** XPS survey spectra of S-MRH and B-MRH after the lithium polysulfide adsorption test.
- Fig. S7.** S 2p XPS spectra of S-MRH and B-MRH before the lithium polysulfide adsorption test.
- Fig. S8.** Galvanostatic discharge and charge profiles of (a) bare PP and (b) B-MRH/PP at 0.1C.
- Fig. S9.** Galvanostatic discharge and charge profiles of S-MRH/PP at 1C after 50th and 100th cycles in cycling test.
- Fig. S10.** Cross-sectional SEM images of (a) Thin S-MRH/PP and (b) Thick S-MRH/PP. (c) rate performance of Thin S-MRH/PP and Thick S-MRH/PP at various C-rates.
- Fig. S11.** Cycling performance of Bare PP electrode at 1C for 250 cycles.
- Fig. S12.** The 2DP and 2DI nucleation and growth modes based on the BFT models and the 3DP and 3DI nucleation and growth modes based on the SH models.
- Fig. S13.** Nucleation rate calculation based on the 2D model.
- Fig. S14.** (a) Digital photographs of folding test on S-MRH/PP. (b) Cycling performance of S-MRH/PP at 0.2 C for 30 cycles. The S-MRH/PP has been folded once as described in Fig. S14(a).
- Table S1** Comparison chart illustrating the synthetic procedures and electrochemical performance of our study compared to other references, focusing on silicon oxide/carbon-based separator modifications or interlayers for Li-S batteries.

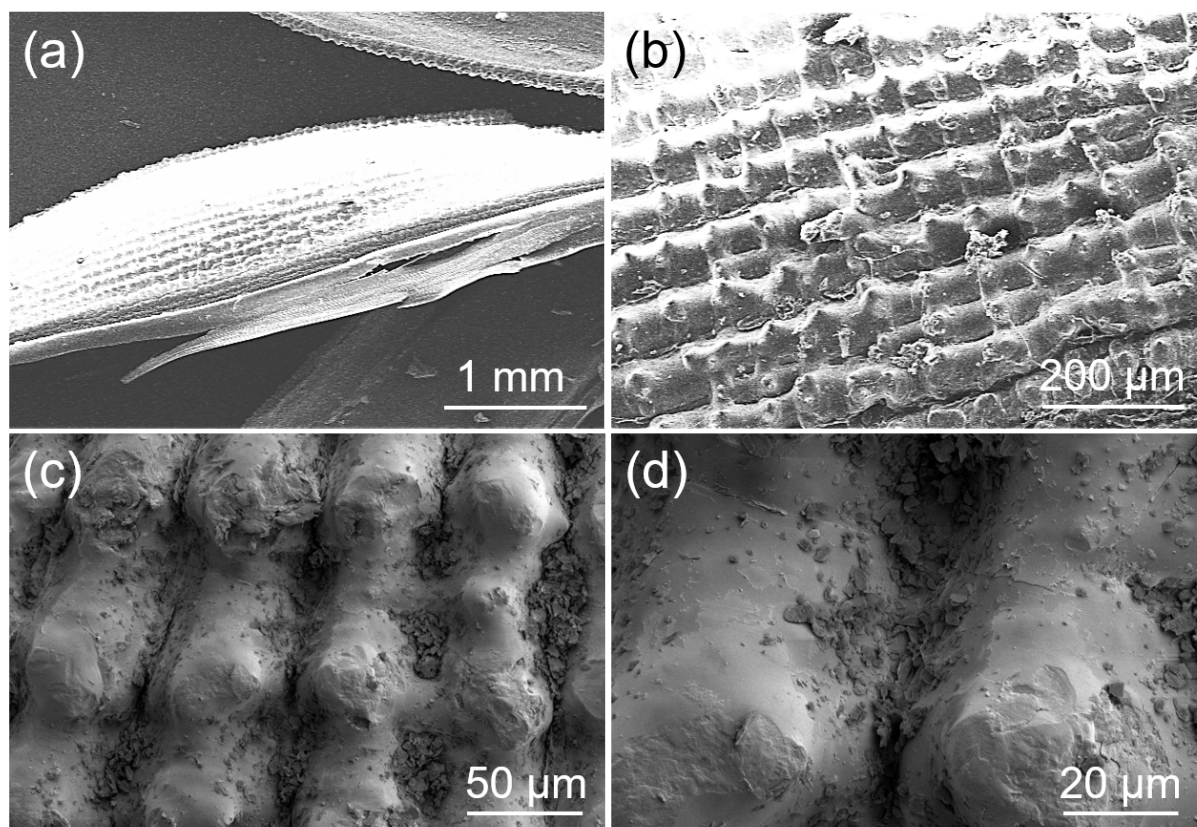

**Fig. S1.** SEM images of bare rice husk at (a-b) low magnification and (c-d) high magnification.

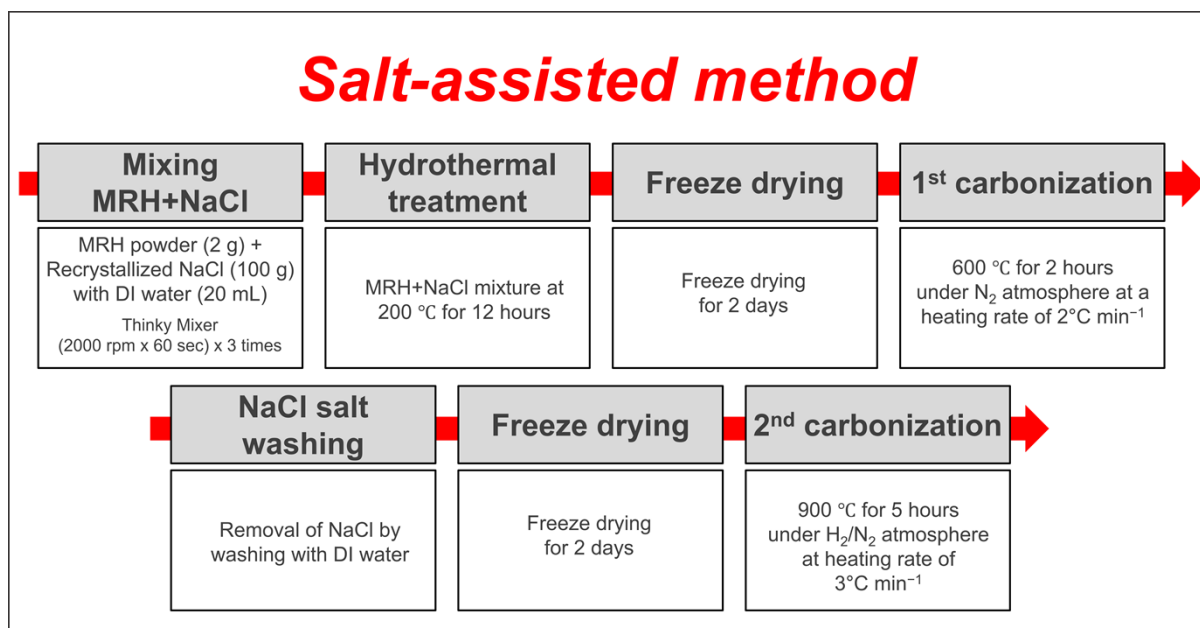

**Fig. S2.** Synthesis flow chart in the salt-assisted method.

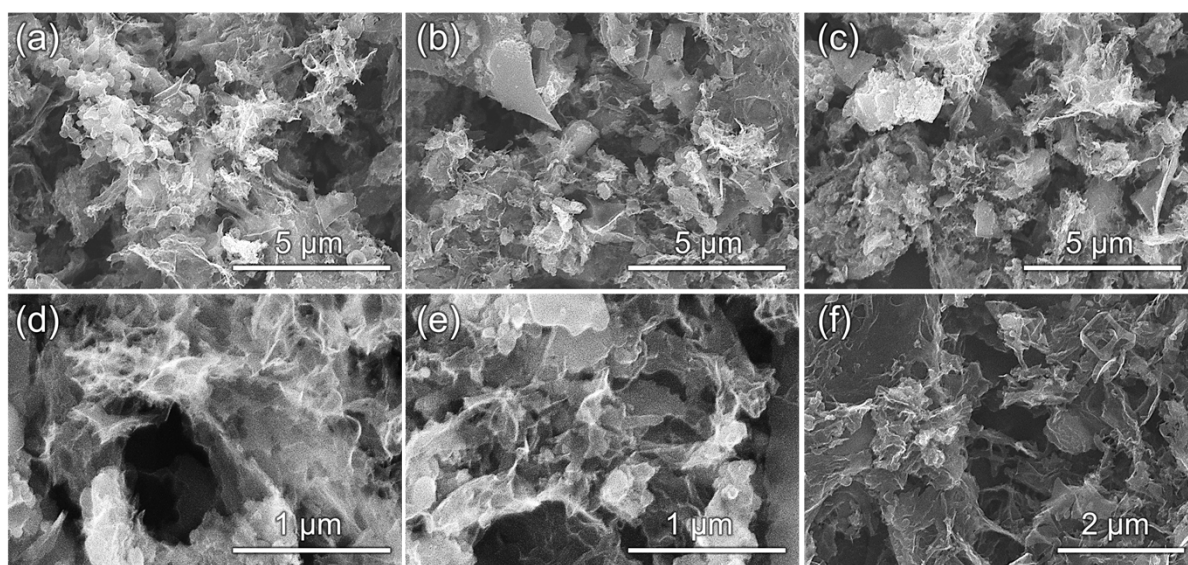

**Fig. S3.** SEM images of S-MRH with (a-c) low and (d-f) high magnifications.

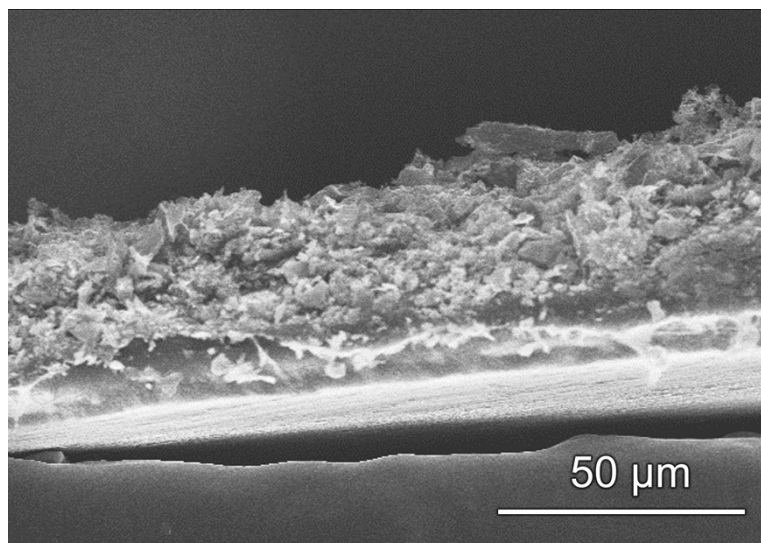

**Fig. S4.** Unclipped cross-sectional SEM image of S-MRH/PP.

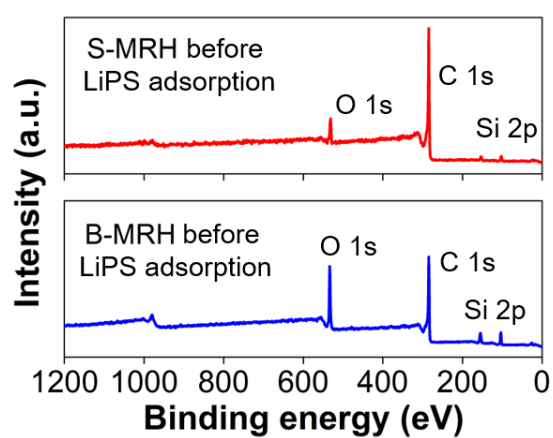

**Fig. S5.** XPS survey spectra of S-MRH and B-MRH before the lithium polysulfide adsorption test.

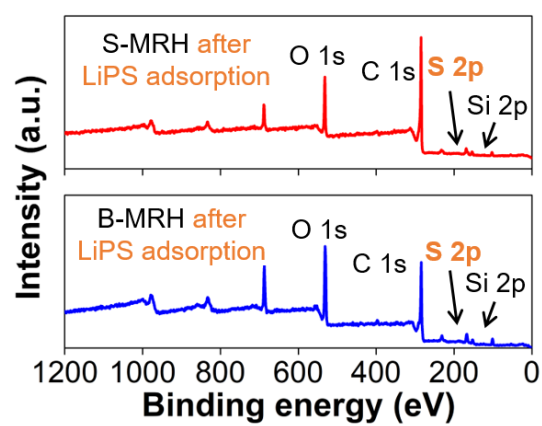

**Fig. S6.** XPS survey spectra of S-MRH and B-MRH after the lithium polysulfide adsorption test.

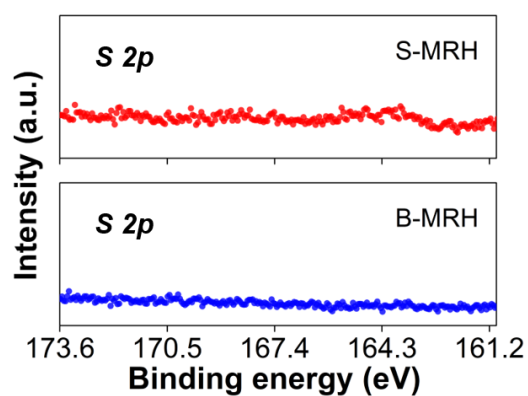

**Fig. S7.** S 2p XPS spectra of S-MRH and B-MRH before the lithium polysulfide adsorption test.

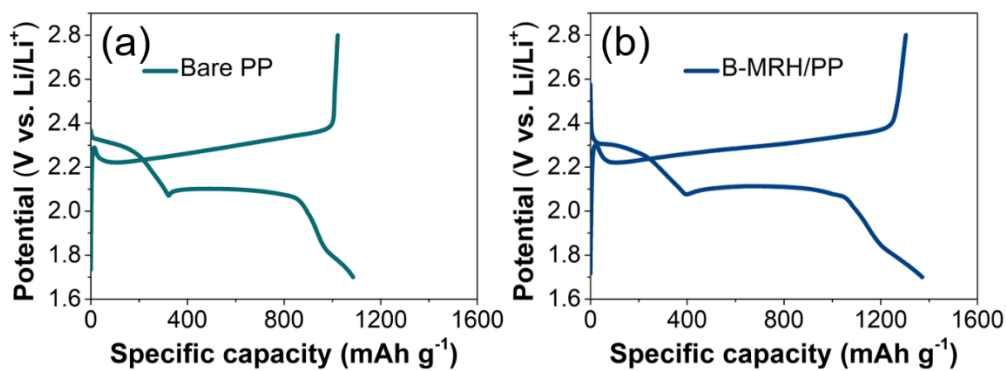

**Fig. S8.** Galvanostatic discharge and charge profiles of (a) Bare PP and (b) B-MRH/PP at 0.1C.



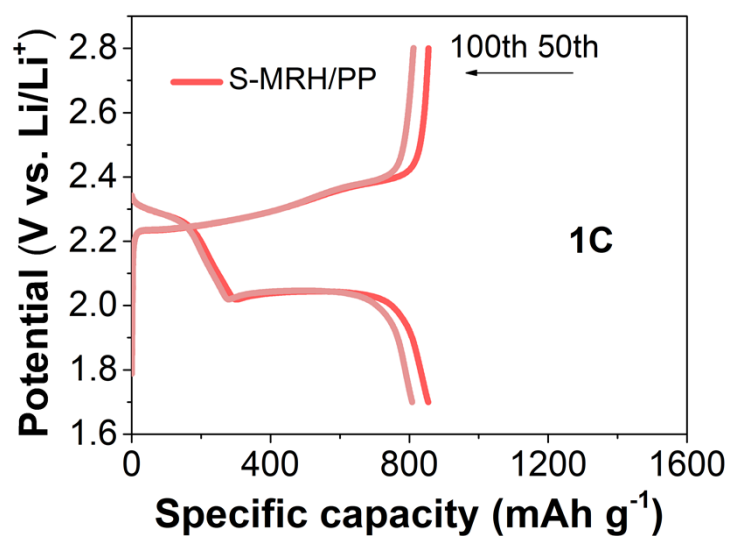

**Fig. S9.** Galvanostatic discharge and charge profiles of S-MRH/PP at 1C after 50th and 100th cycles in cycling test.

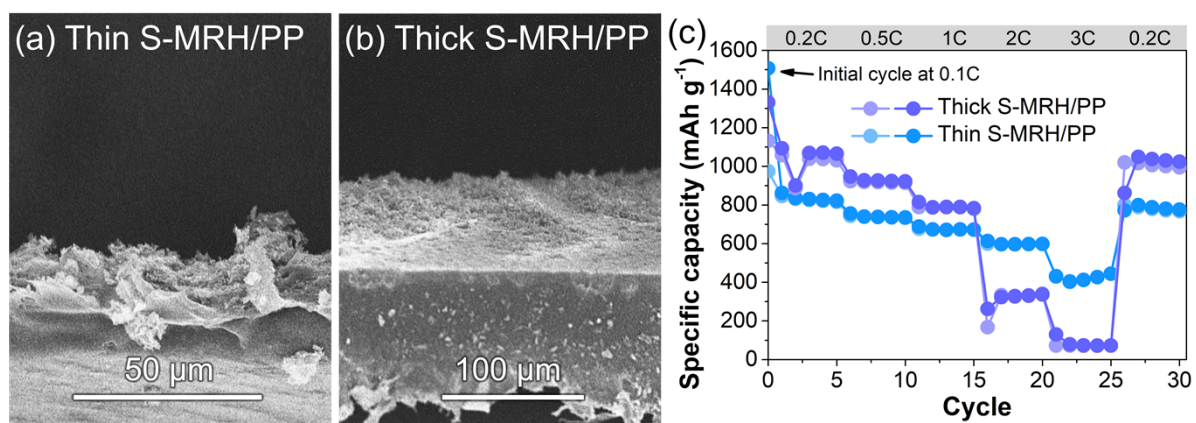

**Fig. S10.** Cross-sectional SEM images of (a) Thin S-MRH/PP and (b) Thick S-MRH/PP. (c) rate performance of Thin S-MRH/PP and Thick S-MRH/PP at various C-rates.



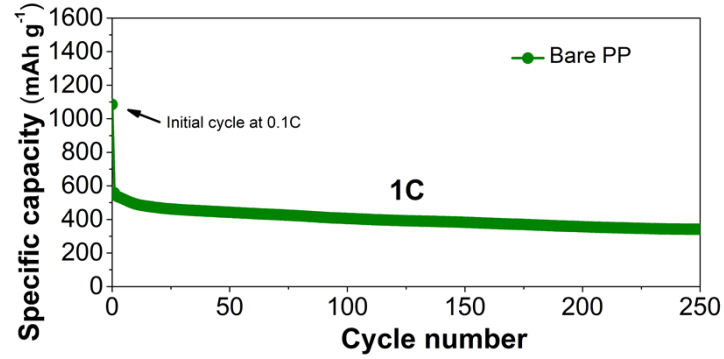

**Fig. S11.** Cycling performance of Bare PP electrode at 1C for 250 cycles.

- The 2D progressive (2DP) and 2D instantaneous (2DI) nucleation and growth modes based on the Bewick, Fleischmann, and Thirsk (BFT) models:

For 2DI,

$$I/I_m = (t/t_m) \exp\{1/2[(1 - (t/t_m)^2)]\}$$

For 2DP,

$$I/I_m = (t/t_m)^2 \exp\{2/3[1 - (t/t_m)^3]\}$$

- The 3D progressive (3DP) and 3D instantaneous (3DI) nucleation and growth modes based on the Scharifker and Hills (SH) models:

For 3DI,

$$I/I_m = (1.9542 t_m/t)^{1/2} \{1 - \exp[1.2564 t/t_m]\}$$

For 3DP,

$$I/I_m = (1.2254 t_m/t)^{1/2} \{1 - \exp[2.3367(t/t_m)^2]\}$$

**Fig. S12.** The 2DP and 2DI nucleation and growth modes based on the BFT models and the 3DP and 3DI nucleation and growth modes based on the SH models.

- Nucleation rate based on the 2D model:

$$N_0 k_g^2 = \frac{\rho^2}{2\pi M^2 t_m^2}$$

$M_{Li_2S}$  and  $\rho_{Li_2S}$  represent 46 g mol<sup>-1</sup>, 1.66 g cm<sup>-3</sup>, respectively.

**Fig. S13.** Nucleation rate calculation based on the 2D model.

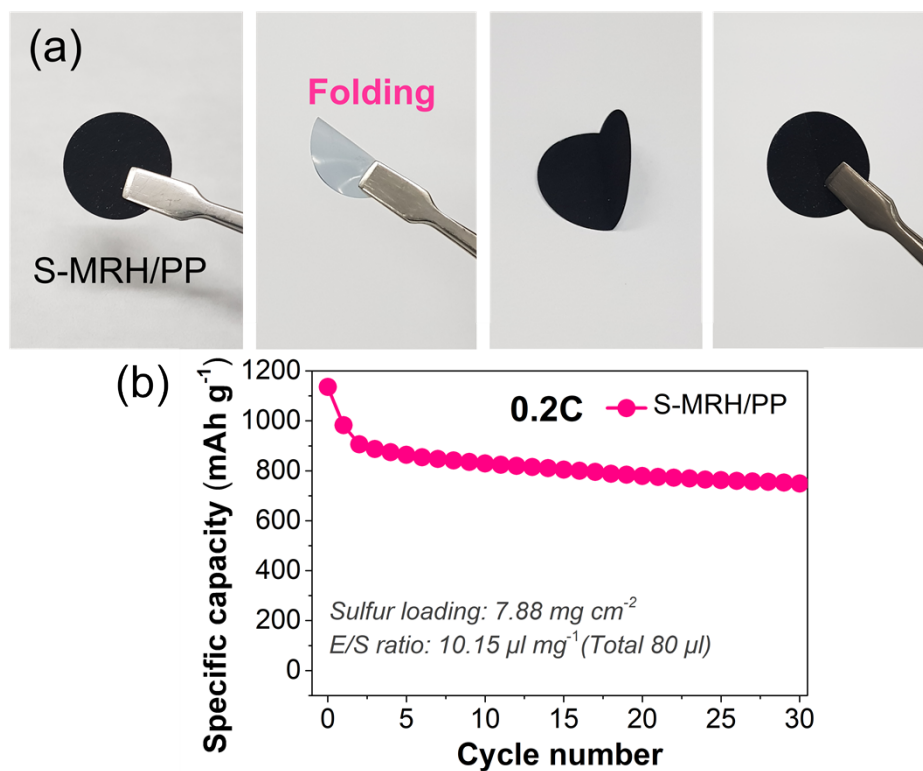

**Fig. S14.** (a) Digital photographs of folding test on S-MRH/PP. (b) Cycling performance of S-MRH/PP at 0.2 C for 30 cycles. The S-MRH/PP has been folded once as described in Fig. S14(a).

**Table S1.** Comparison chart illustrating the synthetic procedures and electrochemical performance of our study compared to other references, focusing on silicon oxide/carbon-based separator modifications or interlayers for Li-S batteries.

| Sample                                                                                                                                    | Synthetic procedure                                                                     | Used chemicals                                                                                                                     | Rate performance                                                                                                                              | Cycle performance                                                                                                                                                                                                                                   | References       |
|-------------------------------------------------------------------------------------------------------------------------------------------|-----------------------------------------------------------------------------------------|------------------------------------------------------------------------------------------------------------------------------------|-----------------------------------------------------------------------------------------------------------------------------------------------|-----------------------------------------------------------------------------------------------------------------------------------------------------------------------------------------------------------------------------------------------------|------------------|
| Rice husk-derived SiO <sub>x</sub> /porous carbon composite (S-MRH)                                                                       | Salt-assisted method                                                                    | Sodium chloride                                                                                                                    | Initial discharge capacity at 1444.9 mAh g <sup>-1</sup> at 0.1C and 766.5 mAh g <sup>-1</sup> at 3C (1.0 mg cm <sup>-2</sup> sulfur loading) | Initial discharge capacity of 1414.4 mAh g <sup>-1</sup> at 0.1C. After 60 cycles 987.27 mAh g <sup>-1</sup> at 0.2C with capacity retention of 82.8% (sulfur loading of 4.0 mg cm <sup>-2</sup> and lean electrolyte of 13.5 μl mg <sup>-1</sup> ) | <b>This work</b> |
| Layered MWCNT/SiO <sub>2</sub> /MW CNT membrane prepared via Langmuir-Blodgett sequential dip coating (LBSDC) and Langmuir-Blodgett (LBS) | Stöber synthetic technique for silica nanosphere                                        | Ammonium hydroxide, tetraethyl orthosilicate (TEOS), MWCNT, and sodium dodecyl sulfate (SDS) surfactant                            | -                                                                                                                                             | Initial discharge capacity of 1470 mAh g <sup>-1</sup> at 0.5C. Capacity retention of 82% after 100 cycles at 0.5C (sulfur loading of 3.5 mg cm <sup>-2</sup> )                                                                                     | [S1]             |
| UiO-66-NH <sub>2</sub> @SiO <sub>2</sub> -coated membrane                                                                                 | Metal-organic framework (MOF) synthesis for UiO-66-NH <sub>2</sub> on commercial silica | 2-aminoterephthalic acid, silica, zirconium(IV) chloride, dimethylformamide (DMF), hydrochloric acid (HCl), and acetonitrile (ACN) | -                                                                                                                                             | Initial discharge capacity of 1400 mAh g <sup>-1</sup> at 0.1C (sulfur loading of 0.5 mg cm <sup>-2</sup> )                                                                                                                                         | [S2]             |
| Biomass-derived carbon fiber@SiO <sub>2</sub> composite (BCF@SiO <sub>2</sub> )                                                           | Carbonization of absorbent cotton and silica                                            | Cotton and silica solution                                                                                                         | Initial discharge capacity of 1352.8 mAh g <sup>-1</sup> at 0.1C. Reversible capacity of 628.6 mAh g <sup>-1</sup> at 3C                      | Initial capacity of 963.2 mAh g <sup>-1</sup> at 1C. After 500 cycles, 618.4 mAh g <sup>-1</sup> with a capacity retention of 64.2% (sulfur loading of 4.2 mg cm <sup>-2</sup> )                                                                    | [S3]             |
| Nano-SiO <sub>2</sub> and MWCNT on aramid paper (SiO <sub>2</sub> /AP)                                                                    | Hot pressing treatment                                                                  | Commercial SiO <sub>2</sub> , para-aramid chopped fibers, MWCNT, sodium dodecyl benzenesulfonate (SDBS) solution,                  | Initial discharge capacity of 1635 mAh g <sup>-1</sup> at 0.05C. Specific discharge capacity of 790 mAh g <sup>-1</sup> at 3C                 | After 200 cycles, 1039 mAh g <sup>-1</sup>                                                                                                                                                                                                          | [S4]             |

|                                                                                                                              |                                            |                                                                                                                                             |                                                                                                                                                                                                                              |                                                                                                                                                                                                          |       |
|------------------------------------------------------------------------------------------------------------------------------|--------------------------------------------|---------------------------------------------------------------------------------------------------------------------------------------------|------------------------------------------------------------------------------------------------------------------------------------------------------------------------------------------------------------------------------|----------------------------------------------------------------------------------------------------------------------------------------------------------------------------------------------------------|-------|
|                                                                                                                              |                                            | polyethylene oxide (PEO), sodium dodecyl sulfate (SDS), and anionic polyacrylamide (APAM)                                                   |                                                                                                                                                                                                                              |                                                                                                                                                                                                          |       |
| SiO <sub>x</sub> -decorated stabilized polyacrylonitrile (sPAN-SiO <sub>x</sub> ) fiber mats                                 | Electrospinning                            | Polyacrylonitrile (PAN), dimethylformamide (DMF), TEOS, and HCl                                                                             | Discharge capacity of 531 mAh g <sup>-1</sup> at 1C                                                                                                                                                                          | Initial discharge capacity of 1321 mAh g <sup>-1</sup> at C/5. After 100 cycles, 646 mAh g <sup>-1</sup> at C/5 (sulfur loading of 3 mg cm <sup>-2</sup> )                                               | [S5]  |
| Silicon dioxide (SiO <sub>2</sub> )-F co-doped poly-m-phenyleneisophthalamide (PMIA)                                         | Electrospinning                            | m-phenylenediamine, isophthaloyl dichloride, N, N-Dimethylacetamide (DMAc), HCl, TEOS, and silane coupling agent 550 (KH550)                | Discharge capacity of 686.6 mAh g <sup>-1</sup> at 2C (sulfur loading of 2.1 mg cm <sup>-2</sup> and electrolyte of 20 µl mg <sup>-2</sup> )                                                                                 | Initial discharge capacity of 1274.8 mAh g <sup>-1</sup> at 0.5C. After 600 cycles, 814.8 mAh g <sup>-1</sup> (sulfur loading of 2.1 mg cm <sup>-2</sup> and electrolyte of 20 µl mg <sup>-2</sup> )     | [S6]  |
| Free-standing SiO <sub>2</sub> /C composite nanofiber mat (FS-SiO <sub>2</sub> /C-CNFM)                                      | Electrospinning                            | TEOS, Polyvinylpyrrolidone (PVP), and nitric acid                                                                                           | Capacity of 504 mAh g <sup>-1</sup> at 2C (sulfur loading of 1-1.6 mg cm <sup>-2</sup> )                                                                                                                                     | Initial capacity of 1567 mAh g <sup>-1</sup> at 0.1C (sulfur loading of 1-1.6 mg cm <sup>-2</sup> )                                                                                                      | [S7]  |
| SiO <sub>2</sub> -nanotubes/carbon composite interlayer (SNTs@CP)                                                            | Template method                            | DL tartaric acid, TEOS, ammonia and CNT                                                                                                     | Initial discharge capacity of 1031 mAh g <sup>-1</sup> at 1C. Specific capacity of 585 mAh g <sup>-1</sup> at 5C                                                                                                             | Initial capacity of 1031 mAh g <sup>-1</sup> at 1C. After 250 cycles, 810 mAh g <sup>-1</sup> at 1C.                                                                                                     | [S8]  |
| SiO <sub>2</sub> hollow nanotubes-aramid fiber(SNTs-AP) interlayer                                                           | Template method and hot pressing           | Para-aramid chopped fiber, para-aramid pulp fiber, sodium dodecylbenzene sulfonate (SDS), CNT, polyacrylamide (APAM), and DL tartaric acid. | Initial specific discharge capacity of 1220 mAh g <sup>-1</sup> at 0.1C. Specific capacity of 808 mAh g <sup>-1</sup> at 2C (sulfur loading of 1.53 mg cm <sup>-2</sup> and electrolyte (1.5g sulfur, 50 µL of electrolyte)) | Initial capacity of 1169 mAh g <sup>-1</sup> at 0.2C. After 80 cycles, 1061 mAh g <sup>-1</sup> at 0.2C (sulfur loading of 1.53 mg cm <sup>-2</sup> and electrolyte (1.5g sulfur, 50 µL of electrolyte)) | [S9]  |
| Mesoporous Silica Nanosphere Composite Metal Cobalt-embedded in Nitrogen-Doped Carbon Nanotubes (Co-NCNTs/SiO <sub>2</sub> ) | Template method and co-impregnation method | Cyanoguanidine, Co(NO <sub>3</sub> ) <sub>2</sub> ·6H <sub>2</sub> O, CTAB, NaOH, and TEOS                                                  | Discharge capacity of 529.5 mAh g <sup>-1</sup> at 2C                                                                                                                                                                        | Initial capacity of 1239.8 mAh g <sup>-1</sup> at 0.2C. After 100 cycles, 759.4 mAh g <sup>-1</sup> at 0.2C with capacity retention of 61.2% (sulfur loading of 4 mg cm <sup>-2</sup> )                  | [S10] |

## References for Table S1

- [1] M.S. Kim, L. Ma, S. Choudhury, S.S. Moganty, S. Wei, L.A. Archer, *J. Mater. Chem. A*, 4 (2016) 14709-14719.
- [2] S. Suriyakumar, A.M. Stephan, N. Angulakshmi, M.H. Hassan, M.H. Alkordi, *J. Mater. Chem. A*, 6 (2018) 14623-14632.
- [3] T. Liu, X.L. Sun, S.M. Sun, Q.H. Niu, H. Liu, W. Song, F.T. Cao, X.C. Li, T. Ohsaka, J.F. Wu, *Electrochim. Acta*, 295 (2019) 684-692.
- [4] R. Li, X.G. Sun, J.Y. Zou, Q. He, Y.H. Xu, *Mater. Res. Express*, 6 (2019).
- [5] E.C. Cengiz, A.A. Hamedani, S.H. Soytaş, R. Demir-Cakan, *Dalton Trans.*, 48 (2019) 4353-4361.
- [6] N.P. Deng, E.B. Ticha, L.Y. Wang, Q.X. Li, H.J. Zhao, L. Gao, M. Liu, Y. Liu, W.M. Kang, B.W. Cheng, *ChemElectroChem*, 6 (2019) 4817-4830.
- [7] A. Belgibayeva, I. Taniguchi, *J. Power Sources*, 484 (2021) 229308.
- [8] C.B. Zhang, K. Li, J.T. Dai, X. Zhang, R. Li, J.Y. Zou, *J. Alloy. Compd.*, 895 (2022) 162580.
- [9] C.B. Zhang, K. Li, W. Luo, J.T. Dai, X. Zhang, R. Li, J.Y. Zou, Z.Y. Xu, *Vacuum*, 195 (2022) 110684.
- [10] Y.M. Li, X.L. Bao, X.W. Wang, J.X. Zhao, P. Chen, H. Liu, H. Wang, L.S. Sun, W.Q. Liu, *ACS Appl. Nano Mater.*, 6 (2023) 18780-18789.
